# Supplementary material
Source: PubMed Central journal article supplement (PMC4422177)
Supplement: NIHMS674067-supplement.pdf [file NIHMS674067-supplement.pdf]

## Race–Sex Differences in the Management of Hyperlipidemia: The REasons for Geographic And Racial Differences in Stroke Study

**Appendix Table 1.** Characteristics of REGARDS participants by race-sex stratum

| Anderson Model Domain  | Category                                                 | Variable                  | White Men<br>(n=7,809) | White Women<br>(n=7,712) | Black Men<br>(n=4,096) | Black Women<br>(n=6,594) | P Value <sup>a</sup> |
|------------------------|----------------------------------------------------------|---------------------------|------------------------|--------------------------|------------------------|--------------------------|----------------------|
| Predisposing Factors   | CHD risk group, no. (%)                                  | CVD/risk equivalent       | 3,295 (42.2)           | 2,194 (28.4)             | 1,920 (46.9)           | 2,711 (41.1)             | <0.001               |
|                        |                                                          | FRS >20%                  | 428 (5.5)              | 61 (0.8)                 | 214 (5.2)              | 58 (0.9)                 |                      |
|                        |                                                          | FRS 10-20%                | 2,989 (38.3)           | 467 (6.1)                | 1,405 (34.3)           | 439 (6.7)                |                      |
|                        |                                                          | FRS <10%                  | 1,097 (14.0)           | 4,990 (64.7)             | 557 (13.6)             | 3,386 (51.3)             |                      |
|                        |                                                          | Age, mean (SD)            | 66.1 (9.2)             | 64.5 (9.5)               | 64.2 (9.1)             | 63.6 (9.2)               | <0.001               |
|                        | REGARDS Region, no. (%)                                  | Stroke Belt               | 2,748 (35.2)           | 2,815 (36.5)             | 1,321 (32.3)           | 2,242 (34.0)             | <0.001               |
|                        |                                                          | Stroke Buckle             | 1,537 (19.7)           | 1,946 (25.2)             | 639 (15.6)             | 1,218 (18.5)             |                      |
|                        |                                                          | Neither Belt/Buckle       | 3,524 (45.1)           | 2,951 (38.3)             | 2,136 (52.1)           | 3,134 (47.5)             |                      |
|                        |                                                          | Annual income, no. (%)    | >\$75,000              | 2,018 (25.8)             | 1,278 (16.6)           | 551 (13.5)               |                      |
|                        | \$35,000-\$75,000                                        | 2,908 (37.2)              | 2,235 (29.0)           | 1,275 (31.1)             | 1,551 (23.5)           |                          |                      |
|                        | \$20,000-\$34,999                                        | 1,661 (21.3)              | 1,876 (24.3)           | 1,129 (27.6)             | 1,731 (26.3)           |                          |                      |
|                        | <\$20,000                                                | 574 (7.4)                 | 1,201 (15.6)           | 785 (19.2)               | 2,018 (30.6)           |                          |                      |
|                        | Education, no. (%)                                       | Declined to report        | 648 (8.3)              | 1,122 (14.5)             | 356 (8.7)              | 855 (13.0)               | <0.001               |
| High school or more    |                                                          | 7,297 (93.4)              | 7,152 (92.7)           | 3,336 (81.4)             | 5,336 (80.9)           |                          |                      |
| Less than high school  |                                                          | 512 (6.6)                 | 560 (7.3)              | 760 (18.6)               | 1,258 (19.1)           |                          |                      |
| Enabling Factors       | Health insurance, no. (%)                                | No                        | 272 (3.5)              | 386 (5.0)                | 361 (8.8)              | 693 (10.5)               | <0.001               |
|                        | Living in zip code in lowest tertile of poverty, no. (%) | Lowest tertile            | 3,749 (48.0)           | 3,487 (45.2)             | 723 (17.7)             | 840 (12.7)               | <0.001               |
|                        | Rural county residence, no. (%)                          | Not rural                 | 5,939 (76.1)           | 5,771 (74.8)             | 3,694 (90.2)           | 5,834 (88.5)             | <0.001               |
| Rural                  |                                                          | 1,085 (13.9)              | 1,079 (14.0)           | 125 (3.1)                | 261 (4.0)              |                          |                      |
| Missing                |                                                          | 785 (10.1)                | 862 (11.2)             | 277 (6.8)                | 499 (7.6)              |                          |                      |
| Perceived Need Factors | Morisky medication adherence, no. (%)                    |                           | 5,059 (64.8)           | 5,015 (65.0)             | 2,553 (62.3)           | 4,122 (62.5)             | <0.001               |
|                        | Aware of hyperlipidemia <sup>b</sup> , no. (%)           |                           | 3,639 (69.1)           | 2,879 (78.4)             | 1,577 (60.5)           | 2,463 (71.7)             | <0.001               |
|                        | Current smoking, no. (%)                                 |                           | 905 (11.6)             | 1,039 (13.5)             | 809 (19.8)             | 1,040 (15.8)             | <0.001               |
| Actual Need Factors    | Depressive symptoms, no. (%)                             | CES-D score ≥4            | 440 (5.6)              | 901 (11.7)               | 415 (10.1)             | 1,038 (15.7)             | <0.001               |
|                        | Elevated High Density Lipoprotein Cholesterol, no. (%)   | HDL-C >60 mg/dL           | 821 (10.5)             | 2,917 (37.8)             | 683 (16.7)             | 2,328 (35.3)             | <0.001               |
|                        | Obesity, no. (%)                                         | BMI >30 kg/m <sup>2</sup> | 2,334 (29.9)           | 2,485 (32.2)             | 1,514 (37.0)           | 3,661 (55.5)             | <0.001               |
|                        | Physical Component Summary Score, mean (SD)              |                           | 48.3 (9.6)             | 46.5 (10.9)              | 46.8 (9.8)             | 44.4 (11.0)              | <0.001               |

CES-D, Centers for Epidemiology Studies – Depression; CVD, Cardiovascular disease; FRS, Framingham risk score; HDL-C, High density lipoprotein cholesterol

<sup>a</sup>P-values were calculated using chi-square tests for categorical variables and ANOVA for continuous variables.

<sup>b</sup>Awareness of hyperlipidemia was calculated among participants with hyperlipidemia.

**Race–Sex Differences in the Management of Hyperlipidemia: The REasons for Geographic And Racial Differences in Stroke Study**

**Appendix Figure 1.** Prevalence-Awareness-Treatment-Control (PATC) diagram, overall and by race-sex group

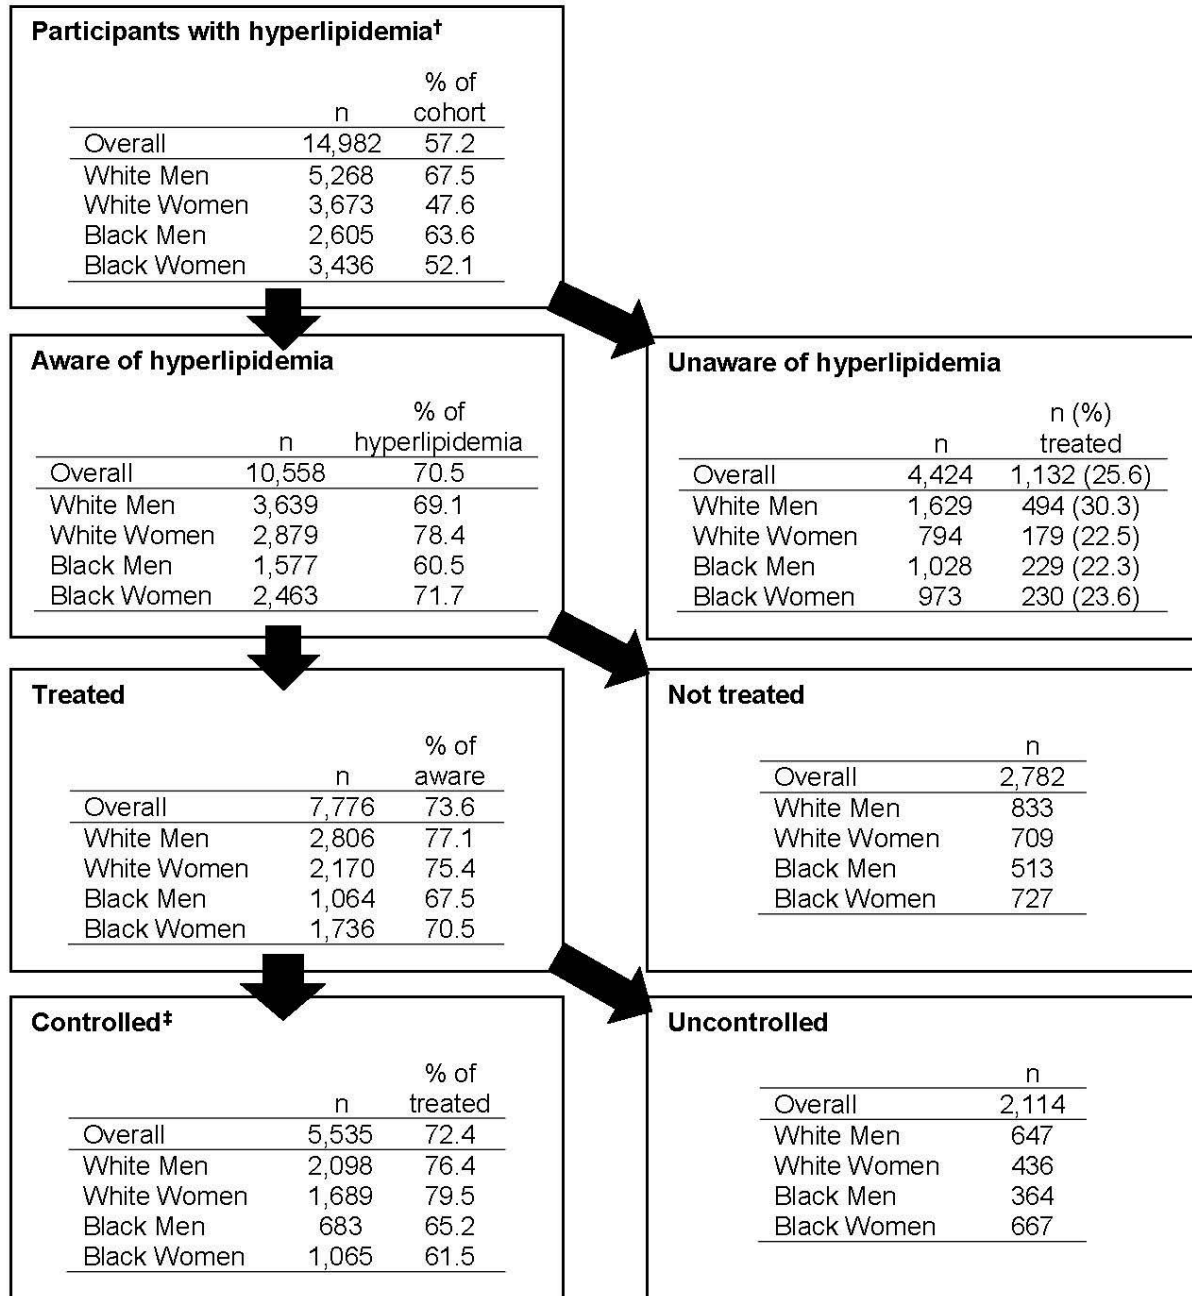

† Hyperlipidemia prevalence estimated out of 26,211 participants, including 7,809 white men, 7,712 white women, 4,096 black men, and 6,594 black women.

‡ 127 participants excluded due to missing LDL-C values.
